# Supplementary material
Source: PubMed Central journal article supplement (PMC6752312)
Supplement: 41436_2018_278_MOESM1_ESM.pdf [file 41436_2018_278_MOESM1_ESM.pdf]

## Supplementary Tables

---

Table S1. Values for inter-reviewer correlation matrix

| Example Call #1 | Example Call #2 | Score |
|-----------------|-----------------|-------|
| S               | S               | 1     |
| A               | A               | 1     |
| F               | F               | 1     |
| G               | G               | 1     |
| F               | G               | 0.5   |
| F               | A               | 0.5   |
| A               | S               | 0.5   |
| G               | A               | 0.5   |
| S               | F               | 0     |
| G               | S               | 0     |
